# Supplementary material for: Toxicity assessment and microbial response to soil antibiotic exposure: differences between individual and mixed antibiotics
Source: Royal Society of Chemistry journal article supplement (doi:10.1039/d1em00405k), 2022-01-01
Supplement: d1em00405k1.pdf [file d1em00405k1.pdf]

**Toxicity assessment and microbial response to soil antibiotics exposure:  
differences between individual and mixed antibiotics**

Bo Jiang<sup>a,b,c,e\*</sup>, Yaoxin Shen<sup>a,b,c</sup>, Xin Lu<sup>f</sup>, Yufan Du<sup>a,b,c</sup>, Naifu Jin<sup>d,e</sup>, Guanghe Li<sup>d,e</sup>, Dayi Zhang<sup>d,e</sup>, Yi Xing<sup>a,b,c\*</sup>

<sup>a</sup>School of Energy and Environmental Engineering University of Science & Technology Beijing, Beijing, 100083, PR China

<sup>b</sup>Beijing Key Laboratory of Resource-oriented Treatment of Industrial Pollutants, University of Science & Technology Beijing, Beijing, 100083, PR China

<sup>c</sup>National Environmental and Energy Science and Technology International Cooperation Base, University of Science & Technology Beijing, Beijing, 100083, PR China

<sup>d</sup>School of Environment, Tsinghua University, Beijing, 100084, PR China

<sup>e</sup>State Key Laboratory of Environmental Simulation and Pollution Control, Tsinghua University, Beijing, 100084, PR China

<sup>f</sup>Petrochina North China Gas Marketing Company, Beijing, 100029, PR China

\*Corresponding author(s):

Bo Jiang

Address: School of Energy and Environmental Engineering University of Science & Technology Beijing, Beijing, 100083, PR China

E-mail: jiangbo\_seee@ustb.edu.cn

Telephone: +86(0)13501144672

Yi Xing

Address: School of Energy and Environmental Engineering University of Science & Technology Beijing, Beijing, 100083, PR China

E-mail: xingyi@ustb.edu.cn

Telephone: +86(0)13910550761

**Table S1** The Physiochemical properties of collected soils

| Parameter                     | Value | Chinese Standard Methods                  |
|-------------------------------|-------|-------------------------------------------|
| pH                            | 6.9   | Glass electrode method (NY/T 1121.2-2006) |
| Moisture (%)                  | 13.7  | Gravimetric analysis (NY/T 52-1987)       |
| Humus (g/kg)                  | 12.8  | Volumetric method (LY/T 1238-1999)        |
| organic matter (g/kg)         | 15.9  | Volumetric method (LY/T 1237-1999)        |
| organic carbon (g/kg)         | 7.4   | Volumetric method (LY/T 1237-1999)        |
| total nitrogen (g/kg)         | 1.78  | Volumetric method (LY/T 1228-2015)        |
| hydrolyzable nitrogen (mg/kg) | 42.7  | Volumetric method (LY/T 1228-2015)        |
| total phosphorus (g/kg)       | 1.22  | UV-VIS (LY/T 1232-2015)                   |
| available phosphorus (mg/kg)  | 58.9  | UV-VIS (LY/T 1232-2015)                   |
| available potassium (mg/kg)   | 93    | ICP- AES (LY/T 1234-2015)                 |

**Table S2** The detection condition of antibiotics via HPLC

| Antibiotics | Chromatographic column                                         | Flow phase                                                 | Flow rate                                                                                                    | Detection absorbance (nm) | Recovery rate (%) | RSD (%) | References                                   |
|-------------|----------------------------------------------------------------|------------------------------------------------------------|--------------------------------------------------------------------------------------------------------------|---------------------------|-------------------|---------|----------------------------------------------|
| SD          | Venusil XBP C18 column                                         | Acetonitrile:water (v/v, 30:70)                            | 0.8 mL/min                                                                                                   | 269                       | 74.28-85.56       | 1.27    | {Chen, 2019 #4587}                           |
| TC          | $\mu$ Bondapak C18 column (3.9 mm $\times$ 300 mm, 10 $\mu$ m) | Acetonitrile:water (v/v, 23:77)                            | 0.7 mL/min                                                                                                   | 254                       | 81.53-92.64       | 1.52    | {Chessa, 2015 #4599}                         |
| EM          | XDB C18 column (4.6 mm $\times$ 100 mm, 5 $\mu$ m)             | (A) 0.1% HCOOH in water and (B) 0.1% HCOOH in acetonitrile | 0.8 mL/min, after a isocratic hold of 5% B for 1 min, the percentage of B linearly increased to 50% in 8 min | 274                       | 79.52-87.49       | 2.03    | {Goulas, 2018 #4601} {Naraginti, 2019 #4602} |

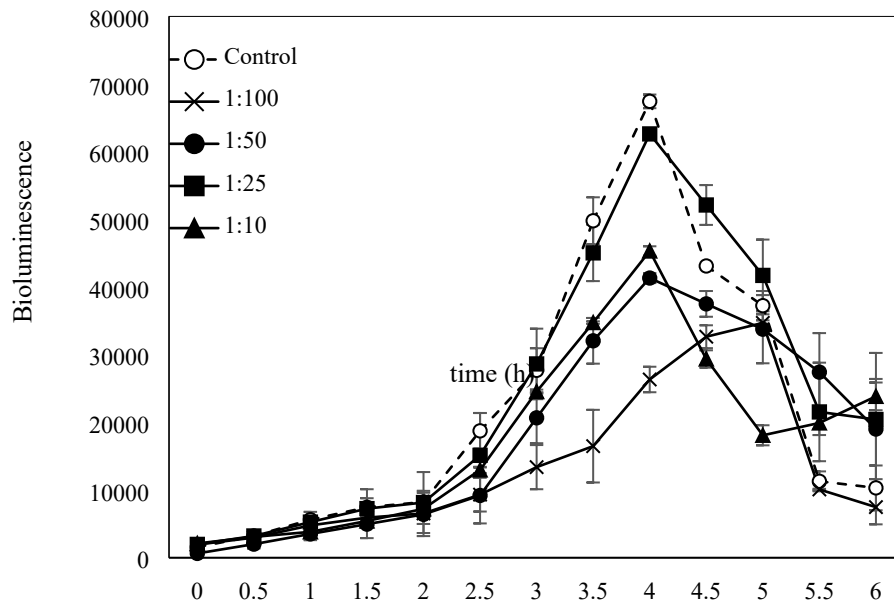

**Figure S1.** The influence of soil/water ratio on the bioluminescent intensity of the bioreporter over time. Control indicates no soil addition. Error bars indicate the standard deviations of the replicates.

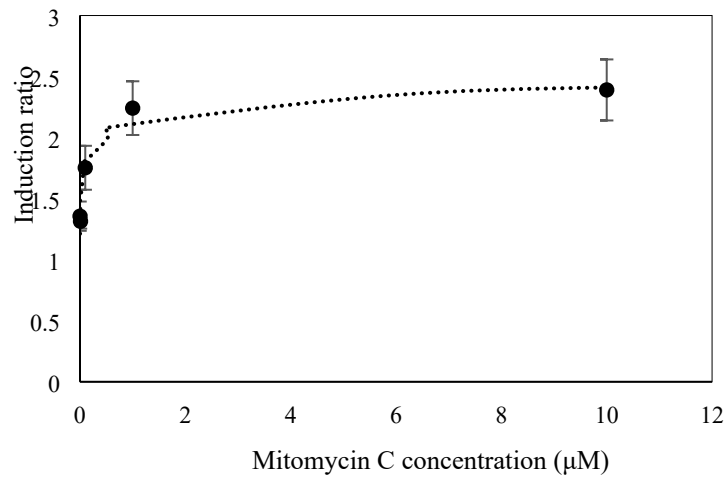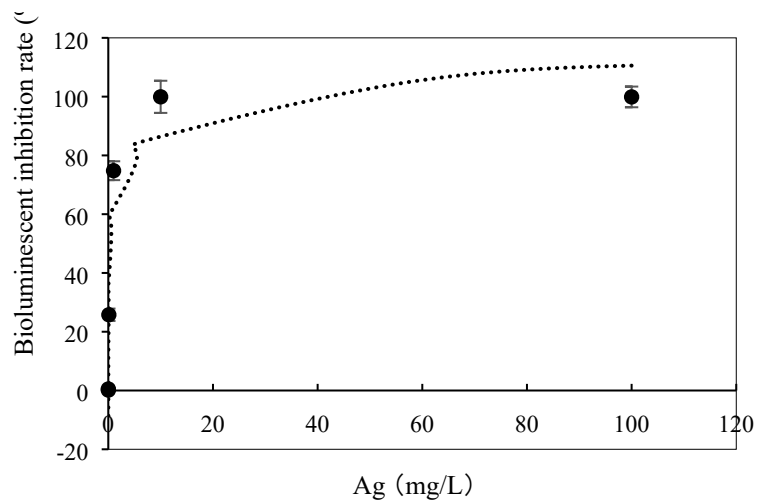

**Figure S2.** Response of ADP1 to mitomycin C and  $\text{Ag}^+$ . (A) Dose-effect relationship between mitomycin C concentration and the bioreporter response; (B) Dose-effect relationship between  $\text{Ag}^+$  concentration and the bioreporter response. Error bars indicate the standard deviations of the replicates.

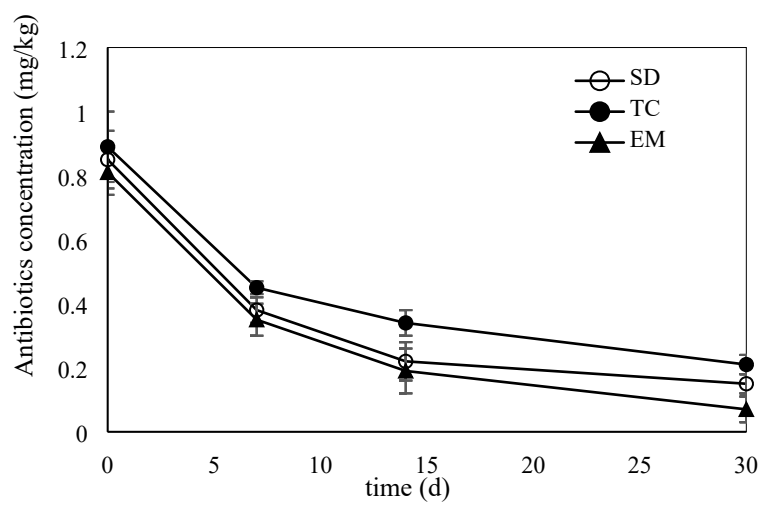

**Figure S3.** The dissipation curves of SD, TC and EM in soils. Error bars indicate the standard deviations of the replicates.

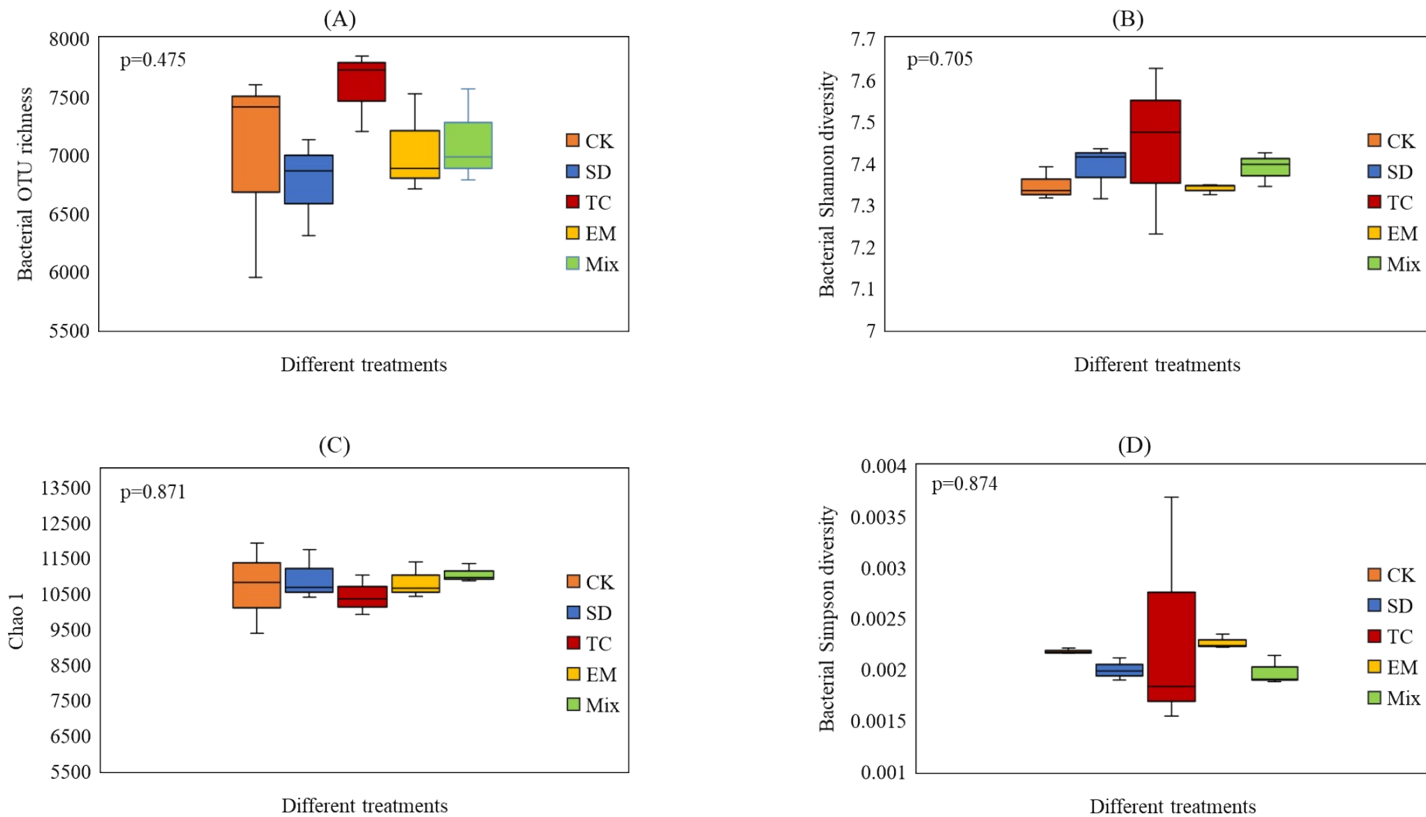

**Figure S4.** Soil bacterial diversity in different treatments (A) bacterial OTU richness; (B) bacterial Shannon diversity; (C) Chao 1 index; (D) bacterial Simpson diversity. CK includes treatments of CK\_7, CK\_14 and CK\_30. SD includes treatments of SD\_7, SD\_14 and SD\_30. TC includes treatments of TC\_7, TC\_14 and TC\_30. EM includes treatments of EM\_7, EM\_14 and EM\_30. Mix includes treatments of Mix\_7, Mix\_14 and Mix\_30. Error bars indicate the standard deviations of the replicates.
